# Supplementary material for: Synthesis and Characterization of Dithiooxamidate-Bridged Polynuclear Ni Complexes
Source: MDPI journal article supplement (doi:10.3390/chemistry5040150), 2023-10-18
Supplement: s1 [file s1]

**Synthesis and characterization of dithiooxamidate-bridged  
polynuclear Ni complexes**

Tomohiko Hamaguchi,<sup>\*</sup> Ryo Kuraoka, Takumi Yamamoto,

Naoya Takagi, Isao Ando and Satoshi Kawata

Supplementary Materials

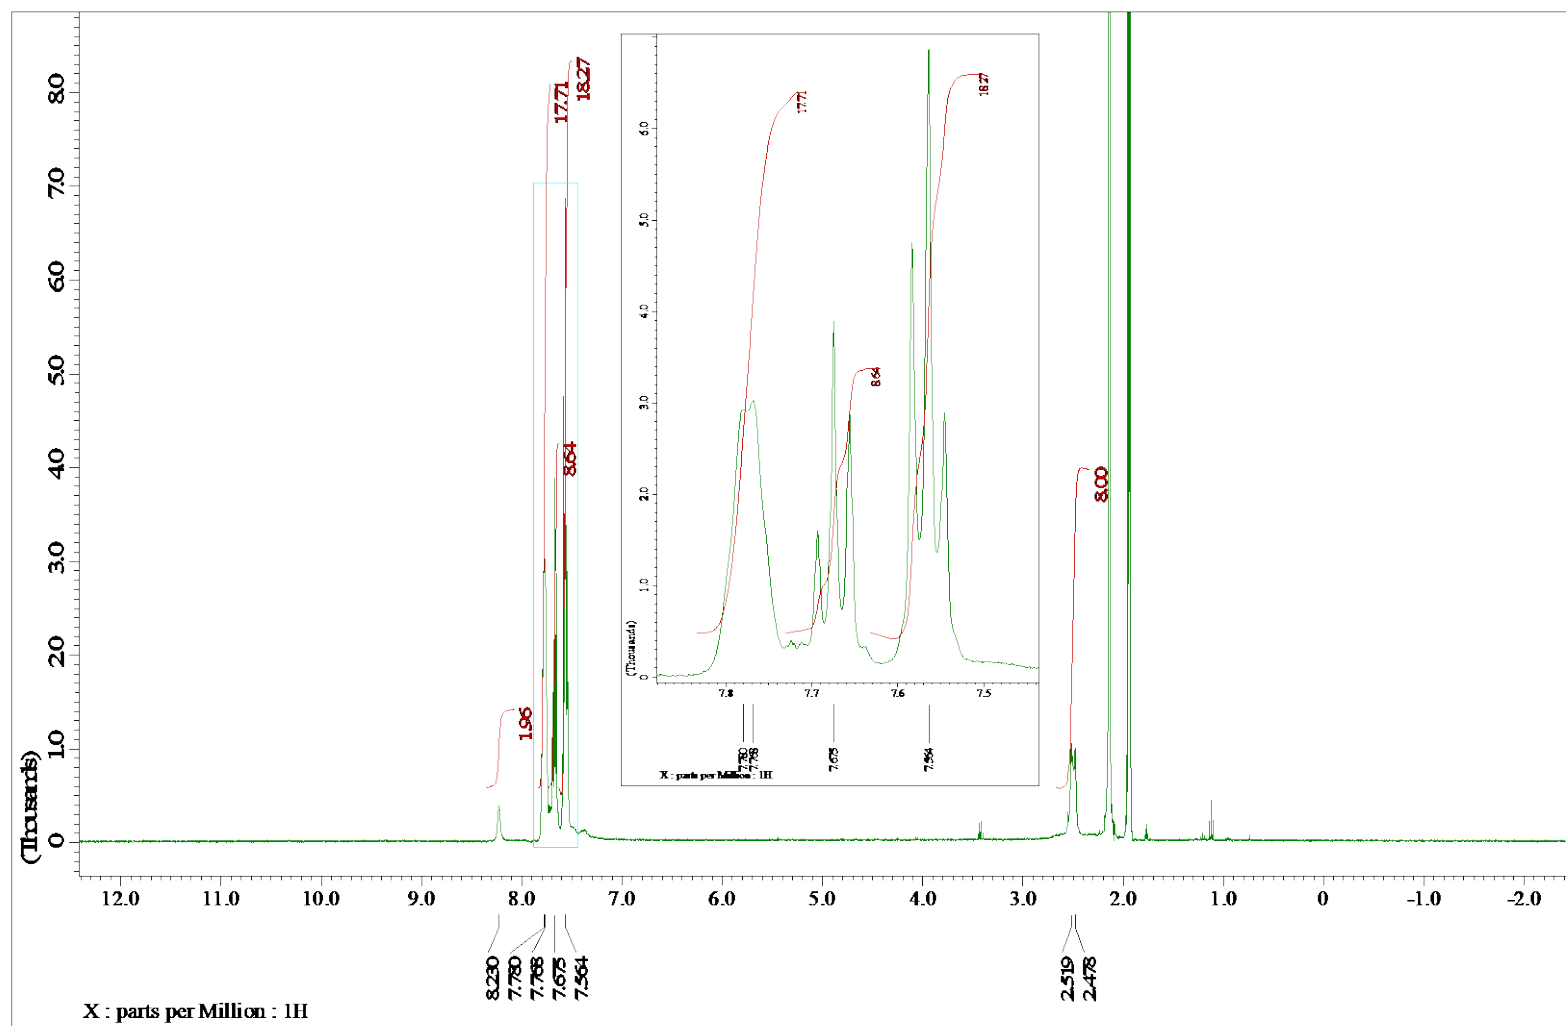

Figure S1 <sup>1</sup>H NMR spectrum of complex **1** in CD<sub>3</sub>CN

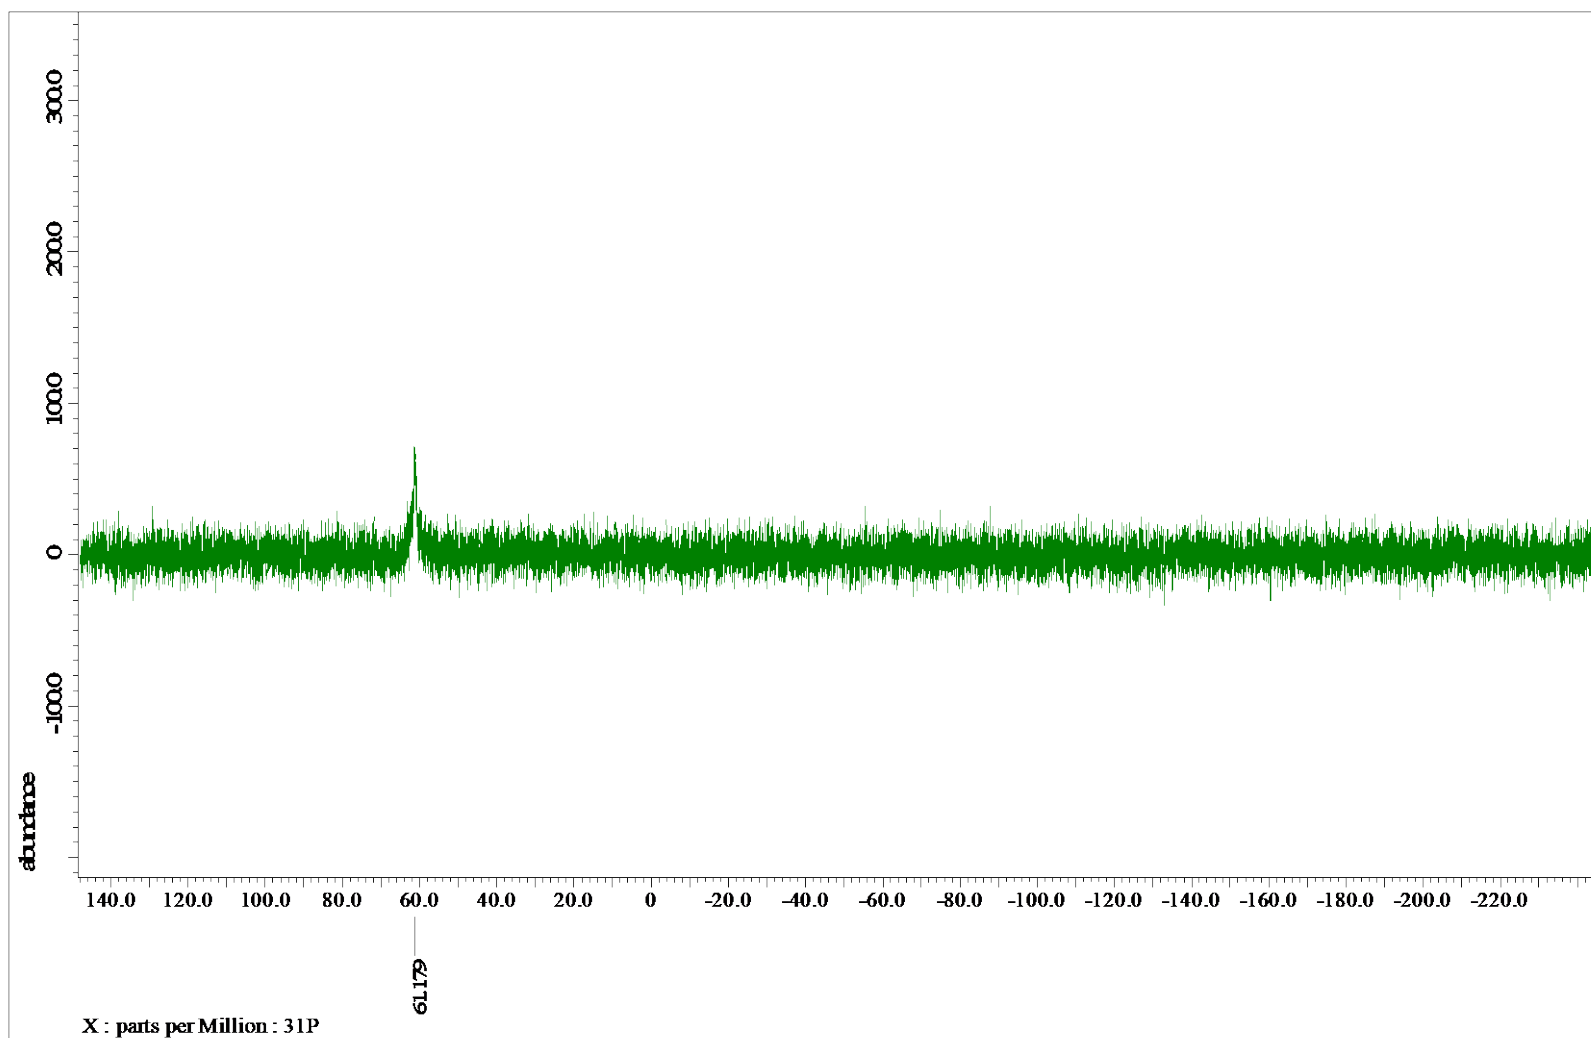

Figure S2  $^{31}\text{P}$  NMR spectrum of complex **2** in  $\text{CD}_3\text{CN}$  (85%  $\text{H}_3\text{PO}_4$  aq. shows a singlet peak at  $\delta$  -1.458 ppm)

Table S1 Crystallographic data

|                                                                              | complex <b>1</b>                                                                                                                          | complex <b>1a</b>                                                                                                                         | complex <b>2a</b>                                                                                                                               | complex <b>3a</b>                                                                                                                           |
|------------------------------------------------------------------------------|-------------------------------------------------------------------------------------------------------------------------------------------|-------------------------------------------------------------------------------------------------------------------------------------------|-------------------------------------------------------------------------------------------------------------------------------------------------|---------------------------------------------------------------------------------------------------------------------------------------------|
| Formula                                                                      | C <sub>84</sub> H <sub>84</sub> B <sub>2</sub> F <sub>8</sub> N <sub>4</sub> Ni <sub>2</sub> O <sub>4</sub> P <sub>6</sub> S <sub>2</sub> | C <sub>56</sub> H <sub>54</sub> B <sub>2</sub> F <sub>8</sub> N <sub>2</sub> Ni <sub>2</sub> O <sub>0</sub> P <sub>4</sub> S <sub>2</sub> | C <sub>93.28</sub> H <sub>97.85</sub> B <sub>2</sub> F <sub>8</sub> N <sub>7</sub> Ni <sub>3</sub> O <sub>2</sub> P <sub>6</sub> S <sub>4</sub> | C <sub>105</sub> H <sub>120</sub> B <sub>2</sub> F <sub>8</sub> N <sub>6</sub> Ni <sub>4</sub> O <sub>6</sub> P <sub>6</sub> S <sub>6</sub> |
| Formula weight                                                               | 1754.53                                                                                                                                   | 1234.05                                                                                                                                   | 2012.82                                                                                                                                         | 2348.70                                                                                                                                     |
| Crystal system                                                               | Triclinic                                                                                                                                 | Triclinic                                                                                                                                 | Triclinic                                                                                                                                       | Triclinic                                                                                                                                   |
| Space group                                                                  | <i>P</i> -1                                                                                                                               | <i>P</i> -1                                                                                                                               | <i>P</i> -1                                                                                                                                     | <i>P</i> -1                                                                                                                                 |
| <i>a</i> /Å                                                                  | 12.6917(5)                                                                                                                                | 12.9801(10)                                                                                                                               | 15.3755(5)                                                                                                                                      | 17.3068(5)                                                                                                                                  |
| <i>b</i> /Å                                                                  | 13.3422(5)                                                                                                                                | 15.7005(13)                                                                                                                               | 16.7251(5)                                                                                                                                      | 18.1122(4)                                                                                                                                  |
| <i>c</i> /Å                                                                  | 13.3579(5)                                                                                                                                | 17.4317(13)                                                                                                                               | 20.9172(6)                                                                                                                                      | 20.3566(5)                                                                                                                                  |
| $\alpha$ /°                                                                  | 115.314(8)                                                                                                                                | 109.039(8)                                                                                                                                | 91.506(6)                                                                                                                                       | 107.072(2)                                                                                                                                  |
| $\beta$ /°                                                                   | 91.395(6)                                                                                                                                 | 98.793(7)                                                                                                                                 | 110.803(8)                                                                                                                                      | 108.790(2)                                                                                                                                  |
| $\gamma$ /°                                                                  | 97.129(7)                                                                                                                                 | 94.153(7)                                                                                                                                 | 106.440(7)                                                                                                                                      | 95.823(2)                                                                                                                                   |
| <i>V</i> /Å <sup>3</sup>                                                     | 2021.39(18)                                                                                                                               | 3290.1(5)                                                                                                                                 | 4774.3(4)                                                                                                                                       | 5637.7(3)                                                                                                                                   |
| <i>Z</i>                                                                     | 1                                                                                                                                         | 2                                                                                                                                         | 2                                                                                                                                               | 2                                                                                                                                           |
| <i>T</i> /K                                                                  | 100(2)                                                                                                                                    | 100(2)                                                                                                                                    | 120(2)                                                                                                                                          | 130(2)                                                                                                                                      |
| <i>D</i> <sub>cal</sub> /g cm <sup>-3</sup>                                  | 1.441                                                                                                                                     | 1.246                                                                                                                                     | 1.400                                                                                                                                           | 1.384                                                                                                                                       |
| $\mu$ /mm <sup>-1</sup>                                                      | 0.708                                                                                                                                     | 0.789                                                                                                                                     | 0.840                                                                                                                                           | 0.921                                                                                                                                       |
| <i>F</i> (000)                                                               | 908                                                                                                                                       | 1268                                                                                                                                      | 2085                                                                                                                                            | 2440                                                                                                                                        |
| Crystal size/mm <sup>3</sup>                                                 | 0.25 × 0.06 × 0.06                                                                                                                        | 0.30 × 0.18 × 0.07                                                                                                                        | 0.32 × 0.23 × 0.10                                                                                                                              | 0.79 × 0.31 × 0.18                                                                                                                          |
| Reflections collected                                                        | 32589                                                                                                                                     | 52221                                                                                                                                     | 76421                                                                                                                                           | 97896                                                                                                                                       |
| Independent reflections                                                      | 9251                                                                                                                                      | 15046                                                                                                                                     | 21849                                                                                                                                           | 32501                                                                                                                                       |
| <i>R</i> <sub>int</sub>                                                      | 0.0735                                                                                                                                    | 0.1196                                                                                                                                    | 0.0423                                                                                                                                          | 0.0549                                                                                                                                      |
| Completeness                                                                 | 0.998                                                                                                                                     | 0.998                                                                                                                                     | 0.998                                                                                                                                           | 0.999                                                                                                                                       |
| Goodness-of-fit on <i>F</i> <sup>2</sup>                                     | 1.054                                                                                                                                     | 0.948                                                                                                                                     | 1.070                                                                                                                                           | 1.054                                                                                                                                       |
| <i>R</i> <sub>1</sub> , <i>wR</i> <sub>2</sub> ( <i>I</i> > 2σ( <i>I</i> ))* | 0.0648, 0.1326                                                                                                                            | 0.0773, 0.1648                                                                                                                            | 0.0543, 0.1335                                                                                                                                  | 0.0920, 0.2470                                                                                                                              |
| <i>R</i> <sub>1</sub> , <i>wR</i> <sub>2</sub> (all data)*                   | 0.1007, 0.1456                                                                                                                            | 0.1372, 0.1916                                                                                                                            | 0.0715, 0.1422                                                                                                                                  | 0.1301, 0.2853                                                                                                                              |

\*  $R_1 = \Sigma ||F_o| - |F_c|| / \Sigma |F_o|$ ,  $wR_2 = ((\Sigma (w(F_o^2 - F_c^2)^2)) / \Sigma (wF_o^4))$

Table S2 Selected bond lengths (Å) and angles (°)

| complex 1  |          | complex 1a    |          | complex 2a |           | complex 3a |          |
|------------|----------|---------------|----------|------------|-----------|------------|----------|
| Ni1–S1     | 2.205(1) | Ni1–S1a       | 2.286(5) | Ni1–S1     | 2.2086(8) | Ni1–S1     | 2.196(1) |
|            |          | Ni1–S2b\$     | 2.263(4) | Ni1–S2     | 2.2251(8) | Ni1–S2     | 2.183(1) |
|            |          | Ni2–S3a       | 2.25(1)  | Ni2–S3     | 2.2082(9) | Ni2–S3     | 2.185(1) |
|            |          | Ni2–S4b%      | 2.238(3) | Ni2–S4     | 2.2030(8) | Ni2–S4     | 2.174(1) |
|            |          |               |          |            |           | Ni3–S5     | 2.179(1) |
|            |          |               |          |            |           | Ni3–S6     | 2.174(1) |
| Ni1–N1#    | 1.932(3) | Ni1–N1a\$     | 1.83(2)  | Ni3–N1     | 1.873(2)  | Ni4–N1     | 2.104(4) |
|            |          | Ni1–N2b       | 1.86(1)  | Ni3–N2     | 1.870(2)  | Ni4–N2     | 2.064(4) |
|            |          | Ni2–N3a%      | 1.89(2)  | Ni3–N3     | 1.861(2)  | Ni4–N3     | 2.099(4) |
|            |          | Ni2–N4b       | 1.89(2)  | Ni3–N4     | 1.870(2)  | Ni4–N4     | 2.080(4) |
|            |          |               |          |            |           | Ni4–N5     | 2.085(4) |
|            |          |               |          |            |           | Ni4–N6     | 2.054(4) |
| Ni1–P1     | 2.186(1) | Ni1–P1        | 2.180(1) | Ni1–P1     | 2.1958(8) | Ni1–P1     | 2.193(1) |
| Ni1–P2     | 2.180(1) | Ni1–P2        | 2.176(1) | Ni1–P2     | 2.2069(9) | Ni1–P2     | 2.187(1) |
|            |          | Ni2–P3        | 2.184(1) | Ni2–P3     | 2.2027(9) | Ni2–P3     | 2.191(1) |
|            |          | Ni2–P4        | 2.179(1) | Ni2–P4     | 2.1954(9) | Ni2–P4     | 2.190(1) |
|            |          |               |          |            |           | Ni3–P5     | 2.197(1) |
|            |          |               |          |            |           | Ni3–P6     | 2.176(2) |
| S1–C27     | 1.723(4) | S1a–C28       | 1.587(7) | S1–C28     | 1.708(3)  | S1–C84     | 1.718(4) |
|            |          | S2b–C28       | 1.589(7) | S2–C29     | 1.717(3)  | S2–C85     | 1.723(4) |
|            |          | S3a–C56       | 1.55(1)  | S3–C57     | 1.714(3)  | S3–C88     | 1.726(4) |
|            |          | S4b–C56       | 1.639(6) | S4–C58     | 1.720(3)  | S4–C89     | 1.729(5) |
|            |          |               |          |            |           | S5–C86     | 1.736(5) |
|            |          |               |          |            |           | S6–C87     | 1.715(4) |
| N1–C27     | 1.313(5) | N1a–C28       | 1.44(2)  | N1–C29     | 1.290(4)  | N1–C84     | 1.291(6) |
|            |          | N2b–C28       | 1.38(1)  | N2–C28     | 1.298(4)  | N2–C85     | 1.286(6) |
|            |          | N3a–C56       | 1.36(2)  | N3–C57     | 1.287(4)  | N3–C88     | 1.286(6) |
|            |          | N4b–C56       | 1.37(2)  | N4–C58     | 1.287(4)  | N4–C89     | 1.270(6) |
|            |          |               |          |            |           | N5–C86     | 1.290(6) |
|            |          |               |          |            |           | N6–C87     | 1.294(6) |
| C27–C27#   | 1.496(7) | C28–C28\$     | 1.459(9) | C28–C29    | 1.493(4)  | C84–C85    | 1.507(6) |
|            |          | C56–C56%      | 1.472(9) | C57–C58    | 1.487(4)  | C86–C87    | 1.500(6) |
|            |          |               |          |            |           | C88–C89    | 1.500(6) |
| N1#–Ni1–S1 | 89.07(9) | N1a\$–Ni1–S1a | 86.6(6)  |            |           |            |          |
|            |          | N2b–Ni1–S2b\$ | 85.0(3)  |            |           |            |          |
|            |          | N3a%–Ni2–S3a  | 83.3(6)  |            |           |            |          |
|            |          | N4b–Ni2–S4b%  | 87.0(5)  |            |           |            |          |
|            |          |               |          | S1–Ni1–S2  | 91.70(3)  | S2–Ni1–S1  | 91.93(5) |
|            |          |               |          | S4–Ni2–S3  | 92.85(3)  | S4–Ni2–S3  | 92.31(5) |
|            |          |               |          |            |           | S6–Ni3–S5  | 92.36(5) |
|            |          |               |          | N2–Ni3–N1  | 83.4(1)   | N2–Ni4–N1  | 77.9(1)  |
|            |          |               |          | N3–Ni3–N4  | 83.3(1)   | N4–Ni4–N3  | 77.8(1)  |
|            |          |               |          |            |           | N6–Ni4–N5  | 78.4(2)  |
| P2–Ni1–P1  | 85.93(4) | P2–Ni1–P1     | 93.36(5) | P1–Ni1–P2  | 91.13(3)  | P2–Ni1–P1  | 91.08(5) |
|            |          | P4–Ni2–P3     | 91.61(5) | P4–Ni2–P3  | 90.32(3)  | P4–Ni2–P3  | 90.88(5) |
|            |          |               |          |            |           | P6–Ni3–P5  | 90.80(5) |

The subscripts #, \$ and % indicate the equivalent atoms generated by the symmetry operators (1–x, 1–y, –z), (2–x, –y, 1–z) and (1–x, 1–y, 2–z), respectively.
